# Supplementary material for: B-Cell Responses to Intramuscular Administration of a Bivalent Virus-Like Particle Human Norovirus Vaccine
Source: PubMed Central journal article supplement (PMC5424242; doi:10.1128/cvi.00571-16), 2017-05-05

**Supplementary Figure 3: Kinetics of memory B-cell responses to GI.1 and GII.4 (consensus) VLPs.** Geometric mean numbers of VLP-specific memory B-cells per  $5 \times 10^5$  total memory B-cells produced in response to intramuscular immunization with different doses of GI.1 and GII.4 VLPs are shown. IgA memory B-cell responses for GI.1 and GII.4 VLPs are given in panels A and B, respectively, while IgG responses are shown in panels C and D. Error bars represent 95% confidence intervals.

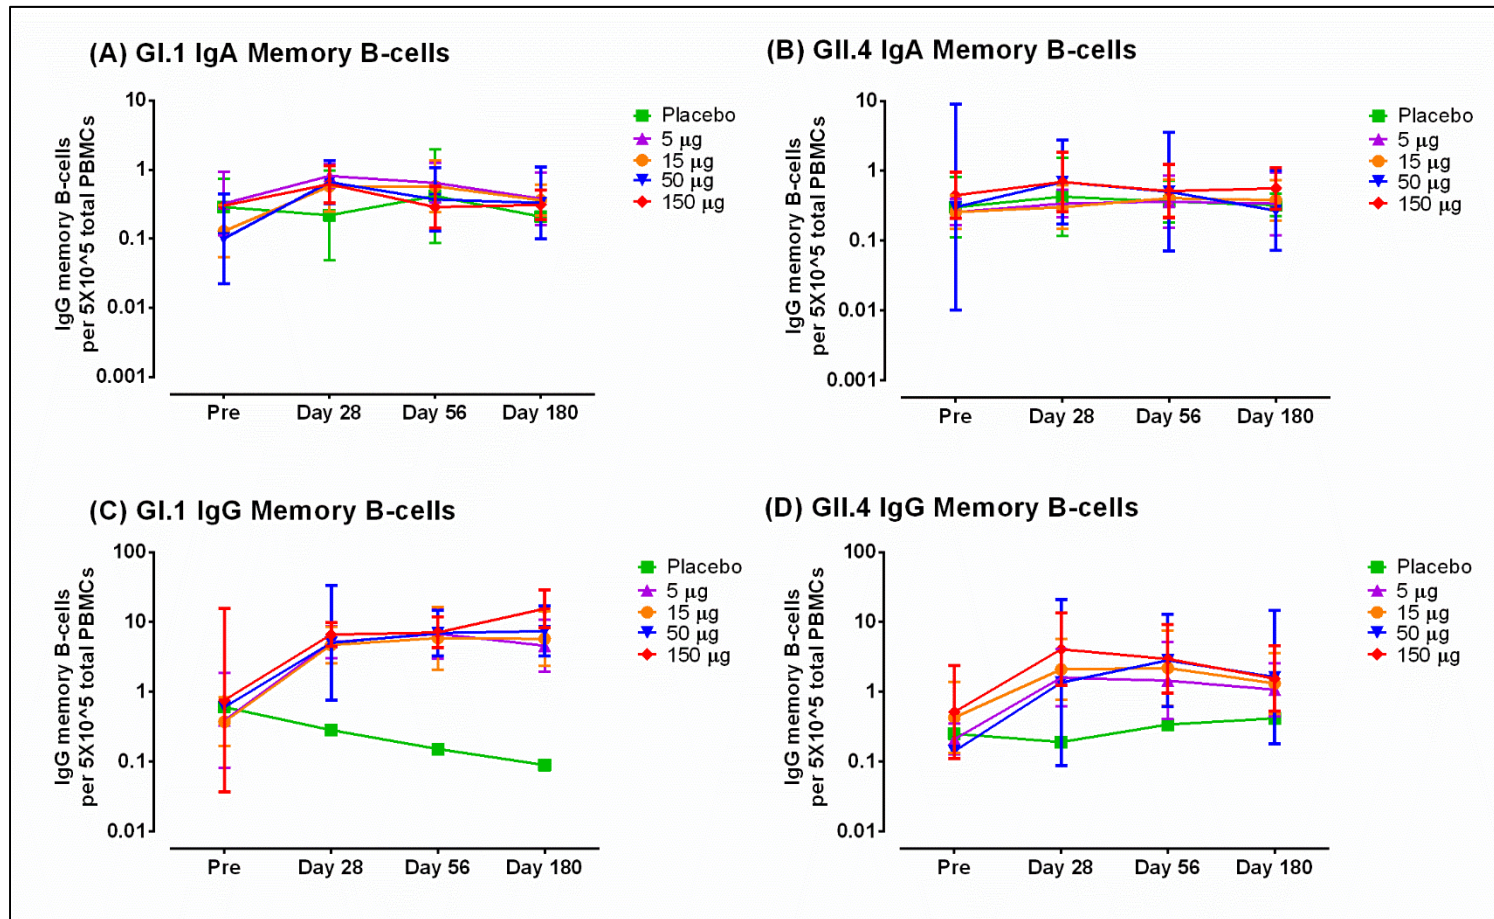

Supplement: CVI.00571-16_zcd999095466s3.pdf [file CVI.00571-16_zcd999095466s3.pdf]
