# Supplementary material for: B-Cell Responses to Intramuscular Administration of a Bivalent Virus-Like Particle Human Norovirus Vaccine
Source: PubMed Central journal article supplement (PMC5424242; doi:10.1128/cvi.00571-16), 2017-05-05

**Supplementary Figure 4: Comparison of memory B-cell responses to GI.1 and GII.4 (consensus) VLPs.** IgA memory B-cells at days 28 and 56 post-vaccination (A, B) and IgG memory B-cell responses at days 28 and 56 post-vaccination (C, D) following intramuscular immunization with the GI.1 and GII.4 VLP formulation. Overall, the magnitude of IgA memory B-cell response to GI.1 VLP was significantly higher than to GII.4 VLPs at day 28 ( $p=0.03$ ) but not day 56. IgG memory B-cell responses to GI.1 VLP were significantly higher than responses to GII.4 VLPs at both days 28 and 56 post vaccination ( $p<0.05$ ). Each bar represents the geometric mean of results for that group (error bars 95% confidence intervals)

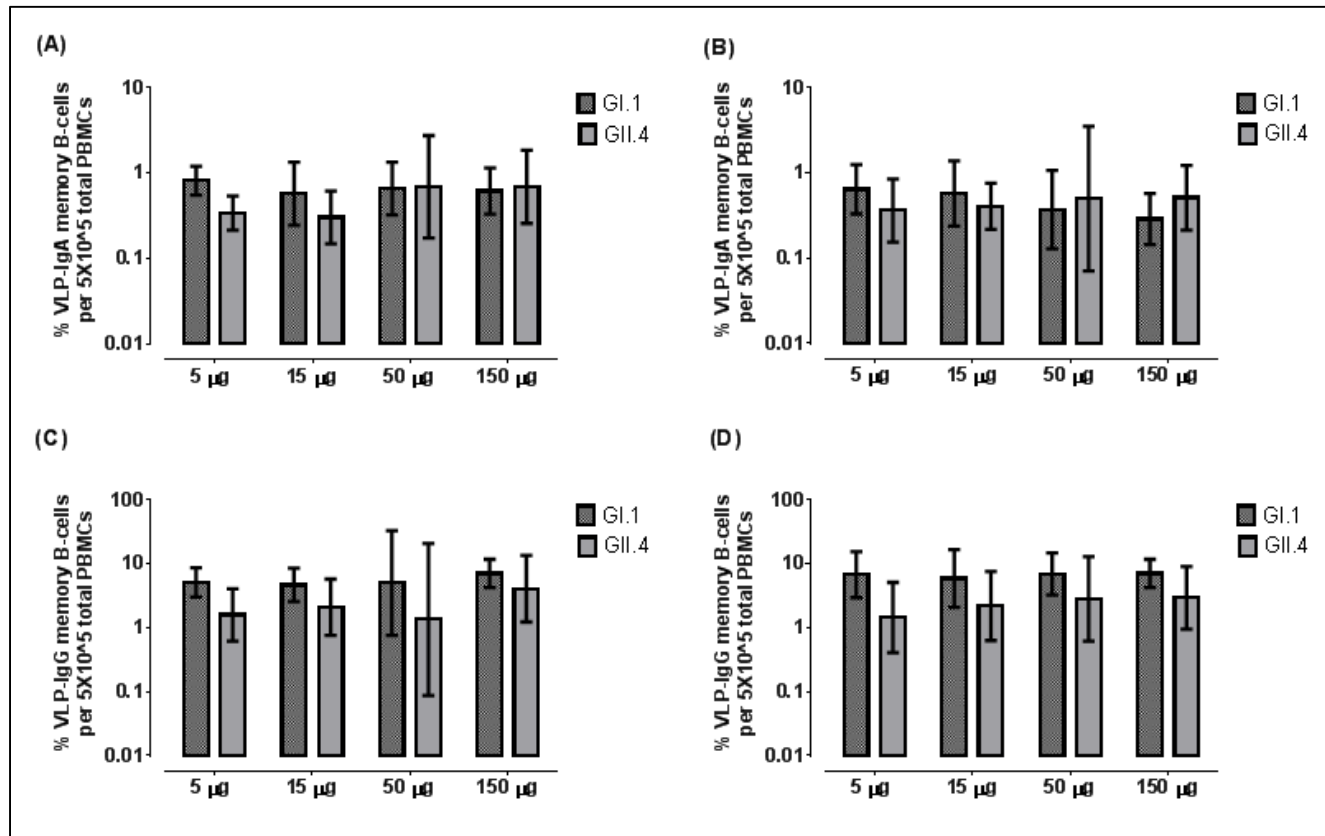

Supplement: CVI.00571-16_zcd999095466s4.pdf [file CVI.00571-16_zcd999095466s4.pdf]
